# Supplementary material for: Structure-Guided Analysis of KRAS G12 Mutants Reveals a Length-Encoded Immunogenic Advantage in G12D
Source: Research Square preprint supplement (doi:10.21203/rs.3.rs-6720638/v1), 2025-06-05
Supplement: Supplementary file 1 [file 0935e793fed9c333b7befe20.docx]

**Supplementary Materials**

**This file includes:**

**Figs. S1 to S5**

**Supplementary table 1-4**

**Supplementary Text**


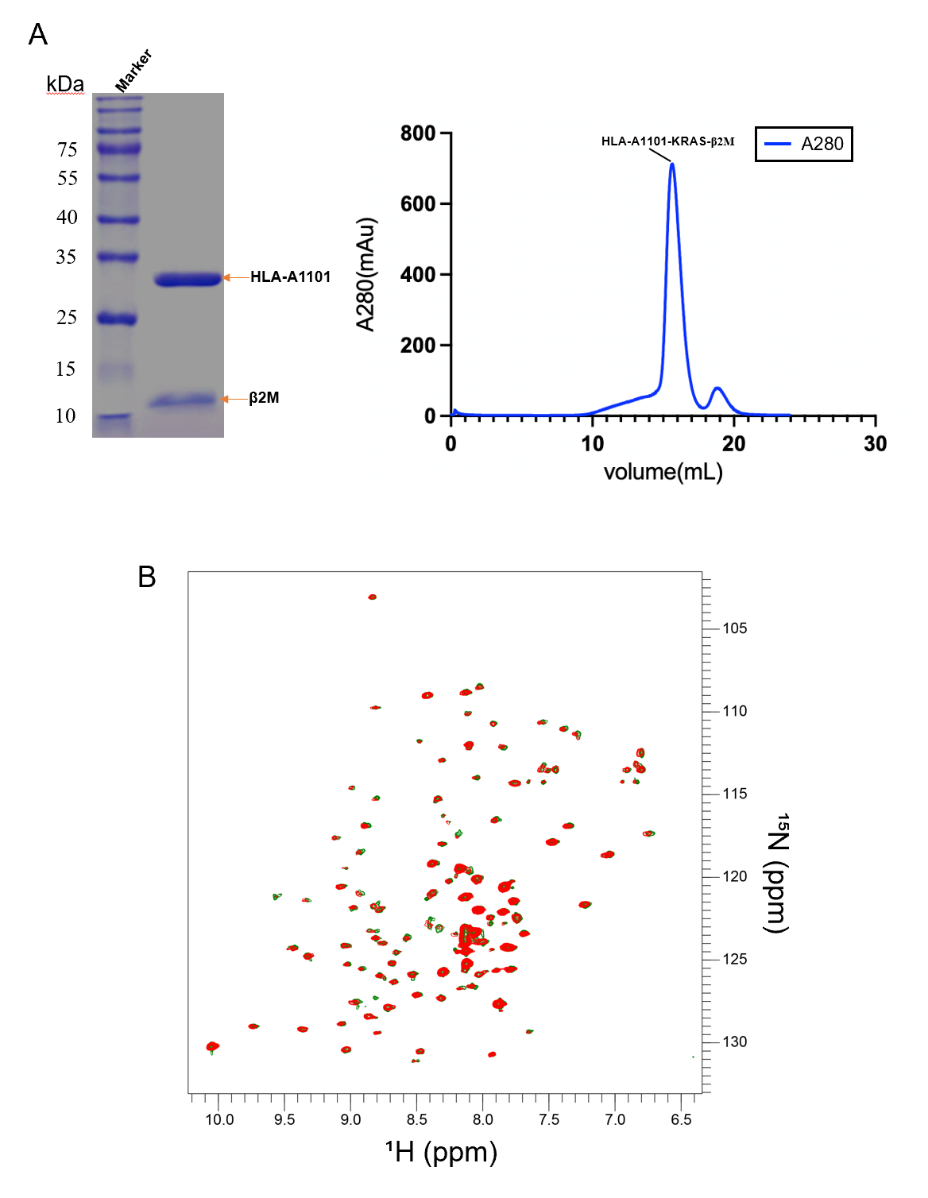


**Fig. S1. Purification and NMR characterization of pMHC complex**

1. Size exclusion profile of pMHC complex using a Superdex-200 10/300GL Cytiva column in FPLC Buffer (20mM Phosphate Buffer/pH7.2, 150mM NaCl). The purified KRAS-HLA complex was verified with SDS-PAGE.
2. Conformational analysis of β₂-microglobulin by NMR. The 2D TROSY-HSQC NMR spectra comparison of β2M in presence of WT (Red) peptides and G12D peptides (Green).


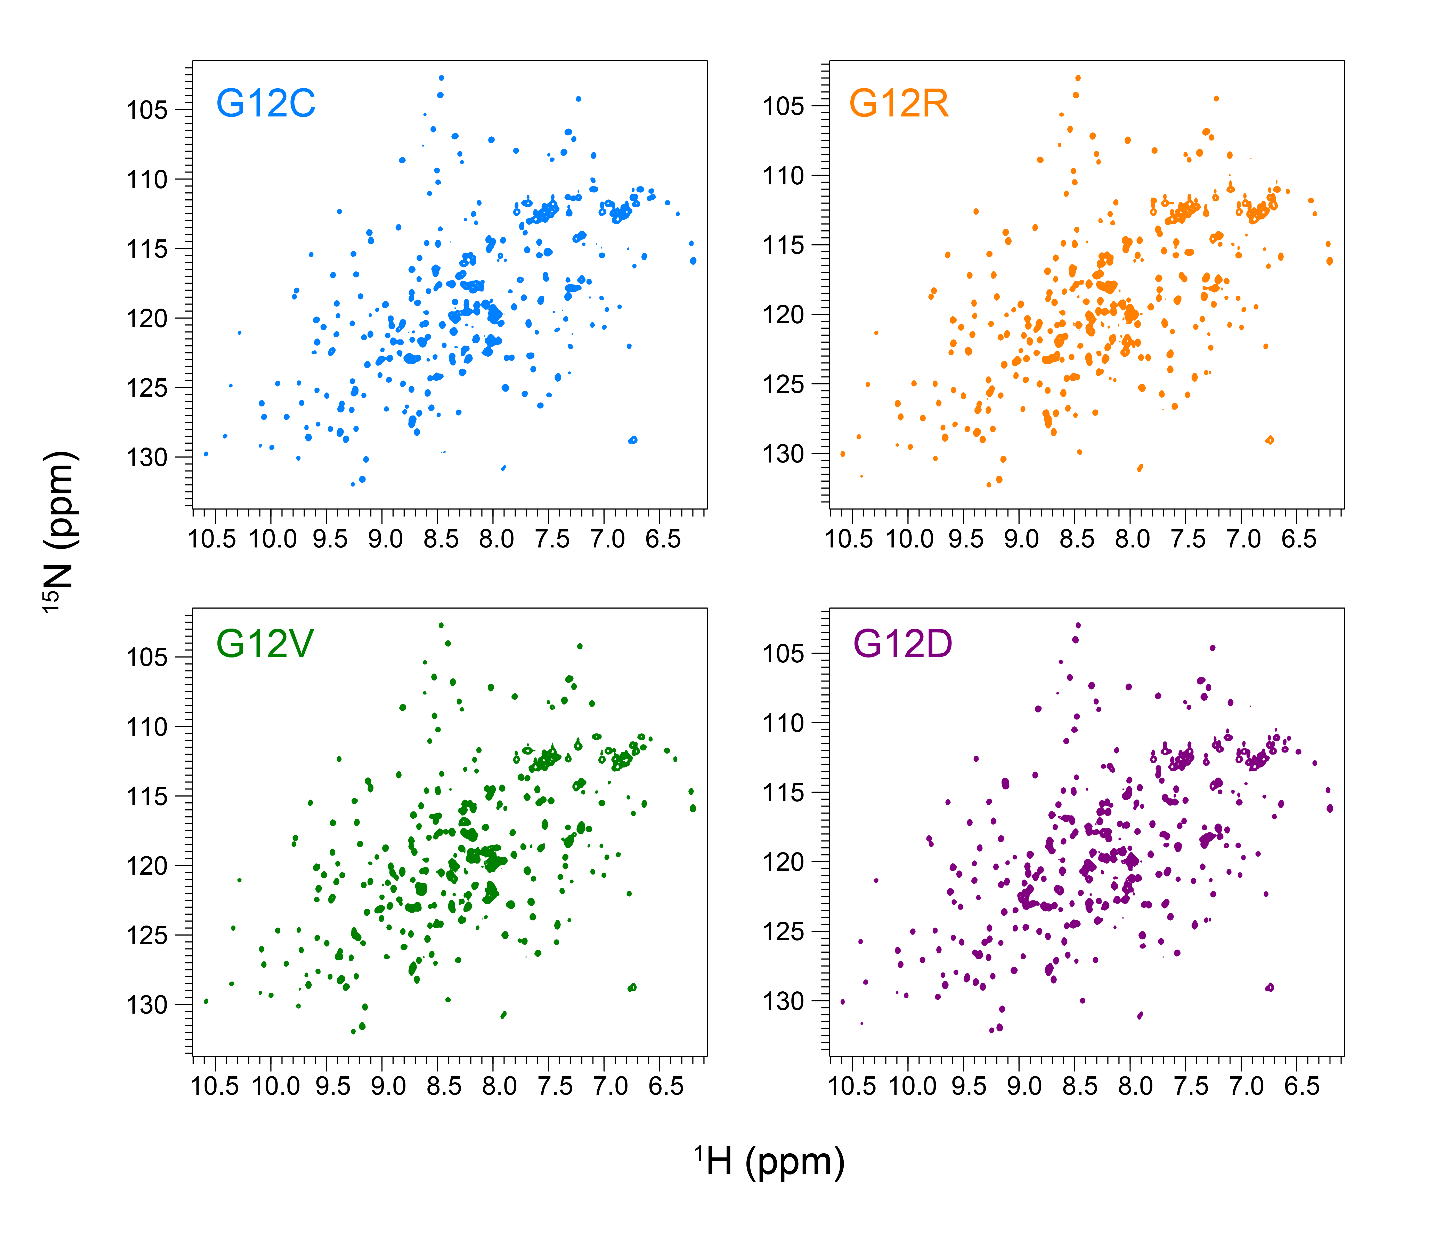


**Fig. S2. Comparative NMR analysis of KRAS G12 mutant complexes**

TROSY-HSQC spectral series of HLA-A*11:01 bound to: (A) G12C (cyan), (B) G12R (orange), (C) G12V (green), (D) G12D (purple). Reference spectrum (WT, red) overlaid for comparison.


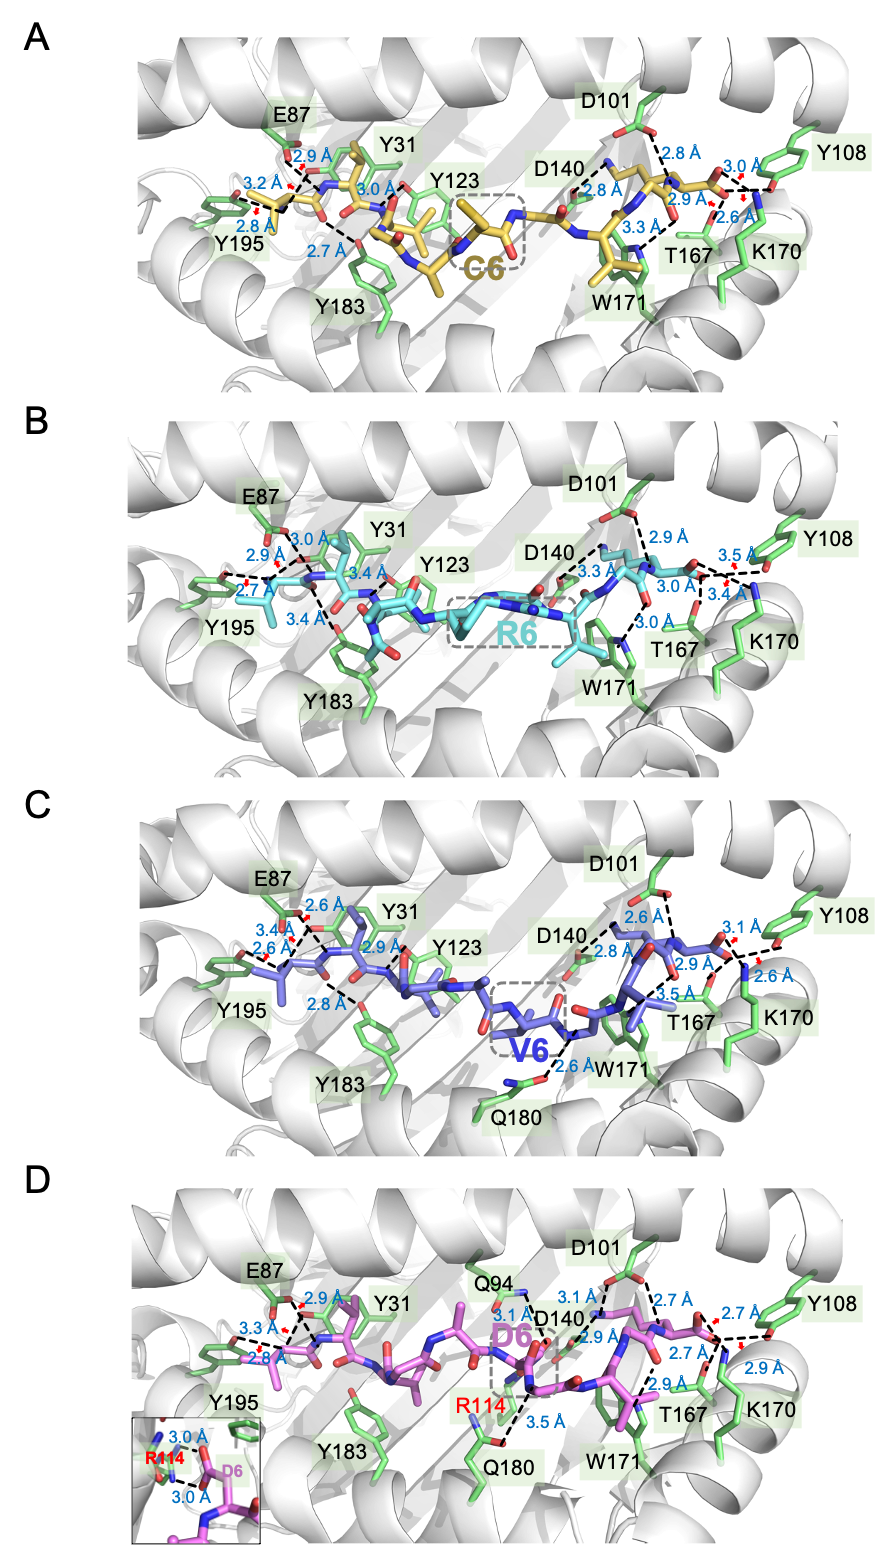


**Fig. S3. Structural determinants of KRAS variant recognition**

High-resolution crystal structures showing critical interaction networks between HLA-A*11:01, directed to Fig 3. (A) G12C; (B) G12R; (C) G12V; (D) G12D, and the lower-left corner panel shows the binding interface of D6.


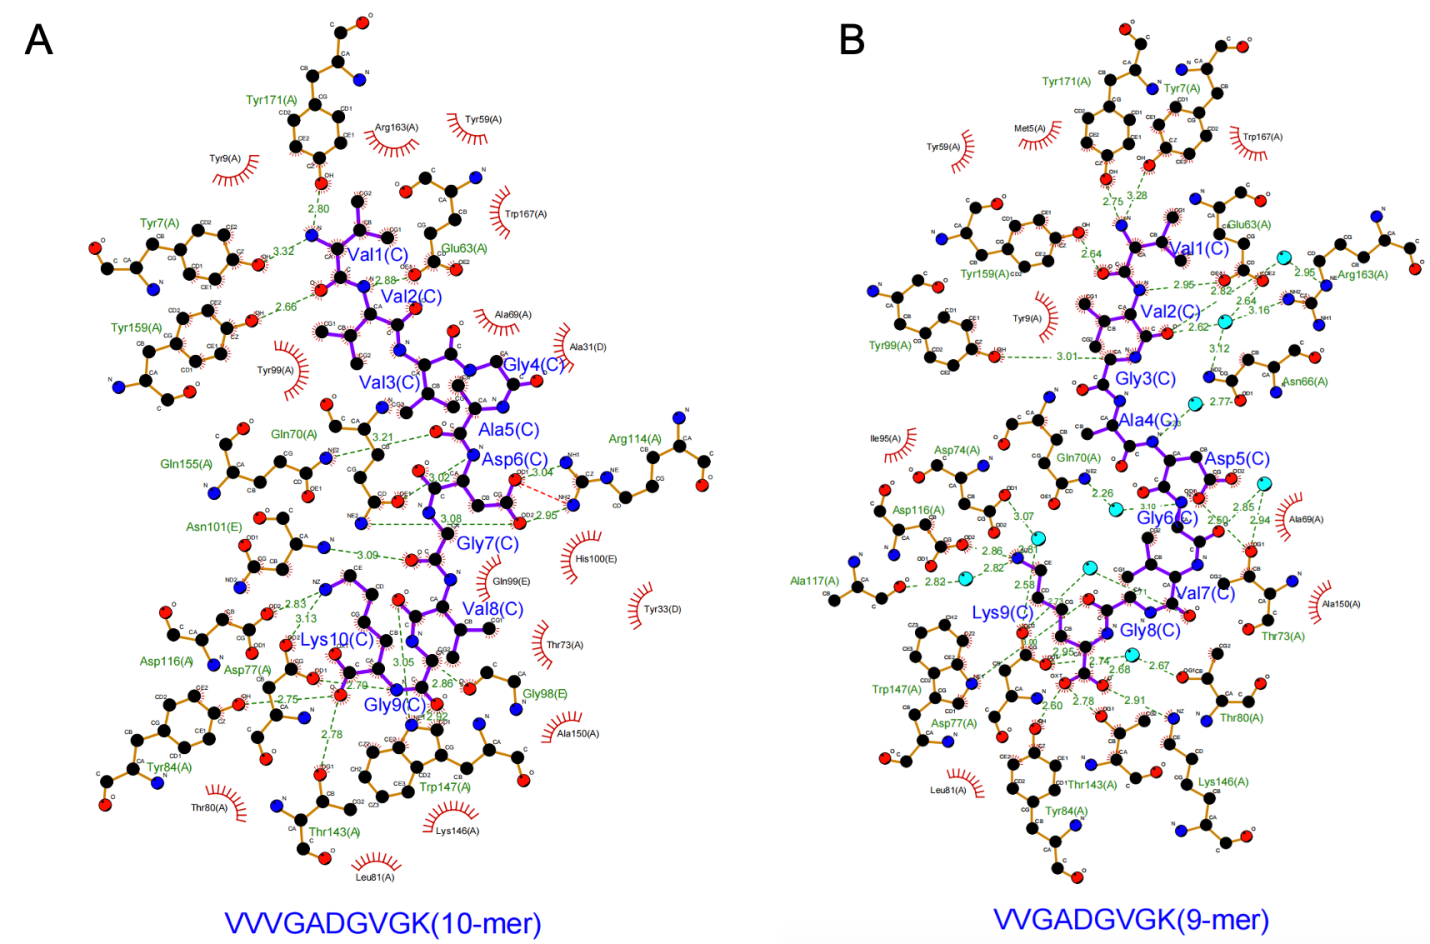


**Fig. S4 Structural presentation of G12D peptide binding sites**

(A) Two-dimensional representation of the G12D-10mer (VVVGADGVGK) peptide binding site.

(B) Two-dimensional representation of the G12D-9mer (VVGADGVGK) peptide binding site.


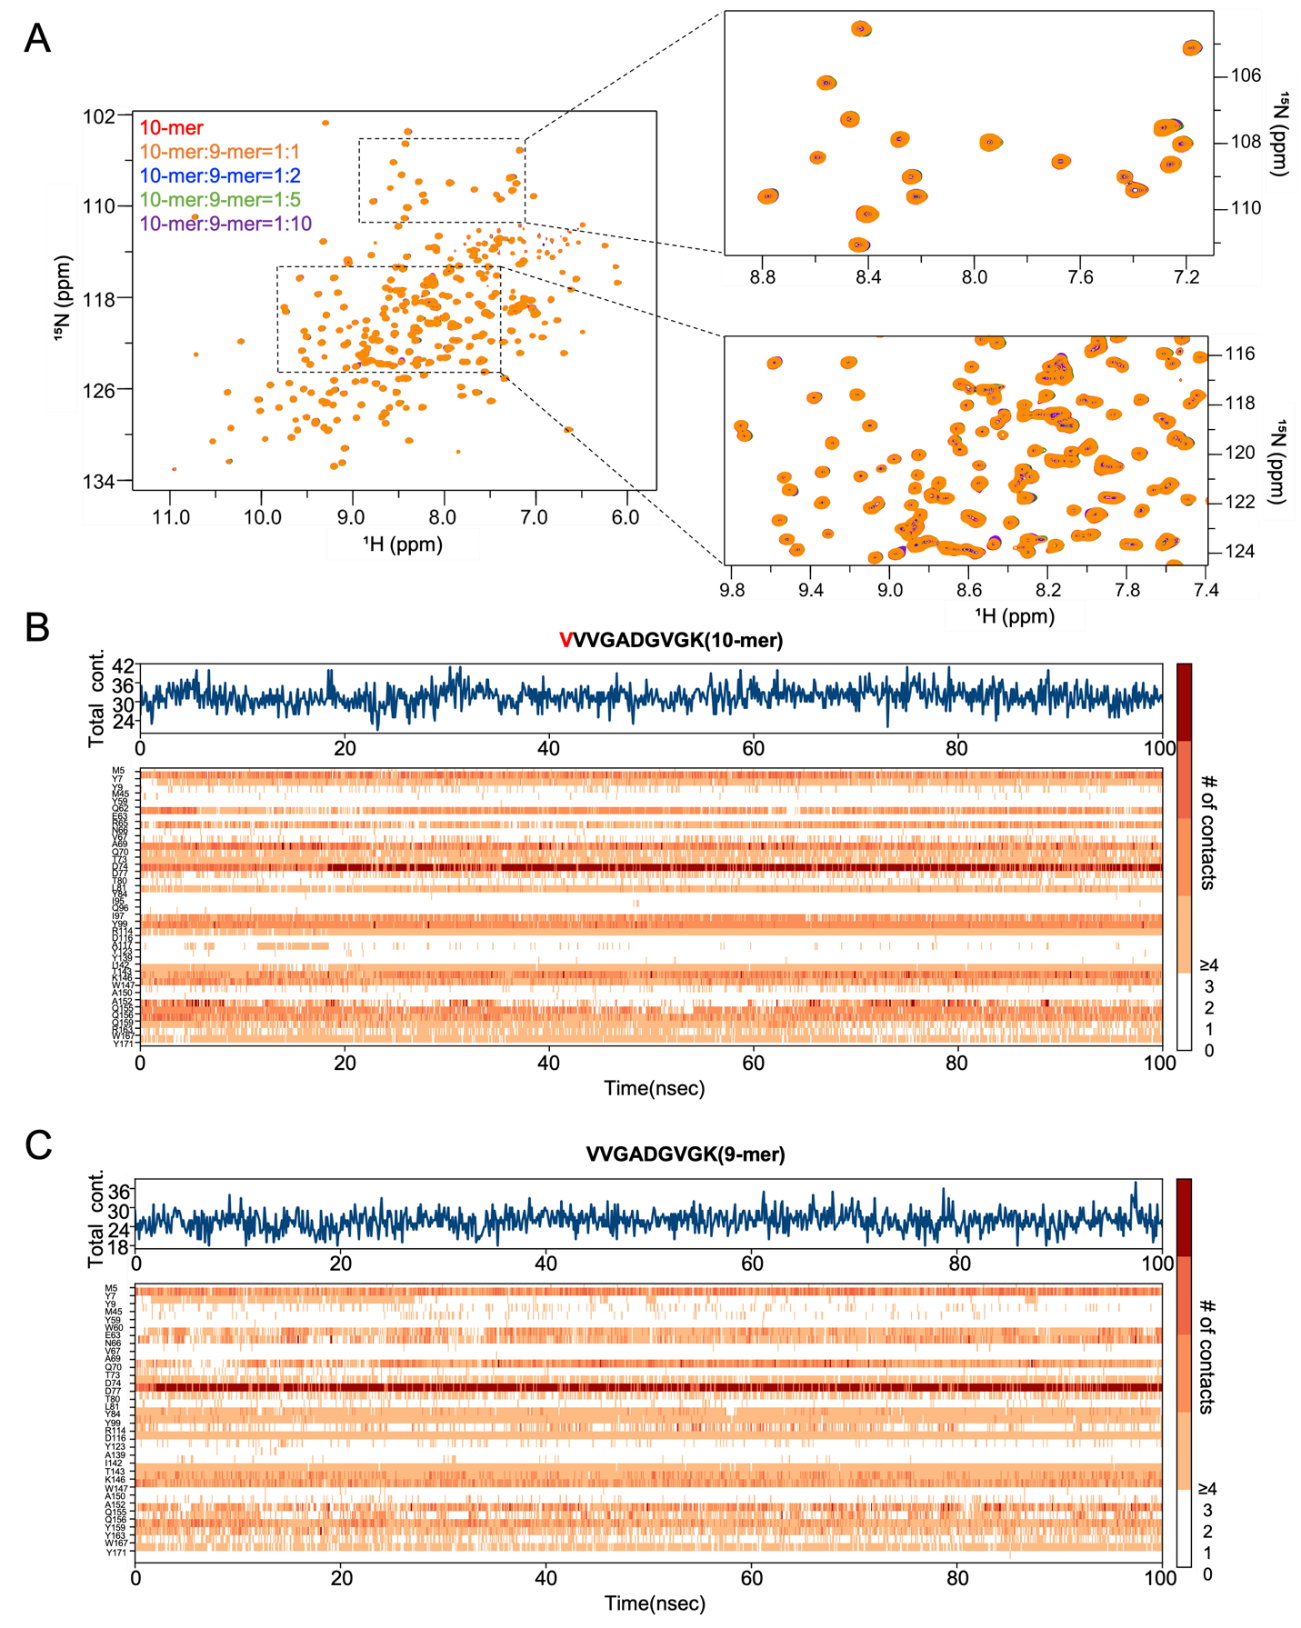


**Fig. S5. Competitive binding analysis and interaction dynamics of G12D peptides with MHC**

(A) NMR-based detection of competitive binding between G12D-9mer and G12D-10mer peptides.

(B) Interaction timeline of MHC with G12D-10mer peptide. Top: Total specific contacts (H-bonds, hydrophobic, ionic, water bridges) per frame. Bottom: Interacting MHC residues (color intensity reflects contact frequency; scale at right).

(C) Interaction timeline of MHC with G12D-9mer peptide (same visualization as B).

**Supplementary table 1 Data collection and refinement statistics of the complex structure of *MHC-G12C***

| Parameter | MHC-G12C_10mer |
| --- | --- |
| **PDB code** | 8K4T |
| **Data collection** |  |
| Space group | *P1* |
| Cell dimensions |  |
| *a*, *b*, *c* (Å) | 48.71, 63.58, 75.51 |
| α, β, γ (°) | 105.86, 92.66, 97.70 |
| Resolution (Å) | 40.78-2.30 (2.38-2.30)* |
| *R*sym or *R*merge (%) | 3.5 (49.3) |
| Mn(I) half-set correlation CC(1/2) (%) | 99.9 (87.8) |
| Total number of observations | 200263 (21663) |
| Total number unique | 129724 (12209) |
| *I / σI* | 13.7 (1.7) |
| Completeness (%) | 97.3 (96.0) |
| Redundancy | 3.5 (3.4) |
| Wilson *B*-factor (Å2) | 45.1 |
| **Refinement** |  |
| No. reflections | 37332 (3630) |
| *R*work / *R*free (%) | 25.8 (31.6) |
| No. atoms |  |
| Chain A | 2238 |
| Chain B | 812 |
| Chain C | 61 |
| Chain D | 2244 |
| Chain E | 797 |
| Chain F | 61 |
| *B*-factors (Å2) |  |
| Chain A | 54.80 |
| Chain B | 54.69 |
| Chain C | 56.46 |
| Chain D | 59.86 |
| Chain E | 62.73 |
| Chain F | 59.95 |
| R.m.s. deviations |  |
| Bond lengths (Å) | 0.002 |
| Bond angles (°) | 0.53 |
| Ramachandran plot |  |
| *Most favored* (%) | 97.20 |
| *Additional allowed* (%) | 2.80 |

*Values in parentheses are for highest-resolution shell.

**Supplementary table 2 Data collection and refinement statistics of the complex structure of *MHC-G12R***

| Parameter | MHC-G12R_10mer |
| --- | --- |
| **PDB code** | 8K4V |
| **Data collection** |  |
| Space group | *P21212* |
| Cell dimensions |  |
| *a*, *b*, *c* (Å) | 118.65, 121.60, 155.81 |
| α, β, γ (°) | 90.00, 90.00, 90.00 |
| Resolution (Å) | 47.93-3.09 (3.22-3.09)* |
| *R*sym or *R*merge (%) | 104.4 (456.2) |
| Mn(I) half-set correlation CC(1/2) (%) | 95.5 (48.3) |
| Total number of observations | 541207 (59739) |
| Total number unique | 41754 (4607) |
| *I / σI* | 13.0 (1.3) |
| Completeness (%) | 95.5 (48.3) |
| Redundancy | 3.5 (3.4) |
| Wilson *B*-factor (Å2) | 40.40 |
| **Refinement** |  |
| No. reflections | 41449 (4023) |
| *R*work / *R*free (%) | 29.6 (34.7) |
| No. atoms |  |
| Chain A | 2250 |
| Chain B | 836 |
| Chain C | 66 |
| Chain D | 2250 |
| Chain E | 836 |
| Chain F | 50 |
| Chain G | 2250 |
| Chain H | 836 |
| Chain I | 50 |
| Chain J | 2250 |
| Chain K | 836 |
| Chain L | 50 |
| *B*-factors (Å2) |  |
| Chain A | 54.06 |
| Chain B | 49.03 |
| Chain C | 64.19 |
| Chain D | 49.64 |
| Chain E | 44.93 |
| Chain F | 49.59 |
| Chain G | 50.90 |
| Chain H | 45.47 |

**Supplementary table 2 Data collection and refinement statistics of the complex structure of *MHC-G12R* (Continued)**

| Parameter | | MHC-G12R_10mer | |
| --- | --- | --- | --- |
| **Refinement** |  | |
| *B*-factors (Å2) |  | |
| Chain I | 41.01 | |
| Chain J | 69.80 | |
| Chain K | 65.44 | |
| Chain L | 86.18 | |
| R.m.s. deviations |  | |
| Bond lengths (Å) | 0.003 | |
| Bond angles (°) | 0.58 | |
| Ramachandran plot |  | |
| *Most favored* (%) | 97.54 | |
| *Additional allowed* (%) | 2.33 | |

*Values in parentheses are for highest-resolution shell.

**Supplementary table 3 Data collection and refinement statistics of the complex structure of *MHC-G12V***

| Parameter | MHC-G12V_10mer |
| --- | --- |
| **PDB code** | 8K50 |
| **Data collection** |  |
| Space group | *P212121* |
| Cell dimensions |  |
| *a*, *b*, *c* (Å) | 116.29, 121.85, 133.38 |
| α, β, γ (°) | 90.00, 90.00, 90.00 |
| Resolution (Å) | 48.83-2.80 (2.89-2.80)* |
| *R*sym or *R*merge (%) | 15.8 (97.3) |
| Mn(I) half-set correlation CC(1/2) (%) | 99.8 (91.2) |
| Total number of observations | 624770 (61050) |
| Total number unique | 47584 (4600) |
| *I / σI* | 15.7 (3.0) |
| Completeness (%) | 99.9 (99.6) |
| Redundancy | 13.1 (13.3) |
| Wilson *B*-factor (Å2) | 43.70 |
| **Refinement** |  |
| No. reflections | 47394 (4672) |
| *R*work / *R*free (%) | 22.4 (27.8) |
| No. atoms |  |
| Chain A | 2240 |
| Chain B | 832 |
| Chain C | 62 |
| Chain D | 2241 |
| Chain E | 836 |
| Chain F | 62 |
| Chain G | 2244 |
| Chain H | 836 |
| Chain I | 50 |
| Chain J | 2241 |
| Chain K | 836 |
| Chain L | 50 |
| *B*-factors (Å2) |  |
| Chain A | 48.96 |
| Chain B | 42.42 |
| Chain C | 48.07 |
| Chain D | 60.94 |
| Chain E | 53.57 |
| Chain F | 64.78 |
| Chain G | 50.87 |
| Chain H | 45.15 |

**Supplementary table 3 Data collection and refinement statistics of the complex structure of *MHC-G12V* (Continued)**

| Parameter | | MHC-G12V_10mer | |
| --- | --- | --- | --- |
| **Refinement** |  | |
| *B*-factors (Å2) |  | |
| Chain I | 53.22 | |
| Chain J | 58.37 | |
| Chain K | 50.34 | |
| Chain L | 63.28 | |
| R.m.s. deviations |  | |
| Bond lengths (Å) | 0.003 | |
| Bond angles (°) | 0.53 | |
| Ramachandran plot |  | |
| *Most favored* (%) | 97.21 | |
| *Additional allowed* (%) | 2.59 | |

*Values in parentheses are for highest-resolution shell.

**Supplementary table 4 Data collection and refinement statistics of the complex structure of *MHC-G12D_9mer***

| Parameter | MHC-G12D_9mer |
| --- | --- |
| **PDB code** | 9UV8 |
| **Data collection** |  |
| Space group | *P1211* |
| Cell dimensions |  |
| *a*, *b*, *c* (Å) | 56.25, 80.00, 57.69 |
| α, β, γ (°) | 90.00, 116.40, 90.00 |
| Resolution (Å) | 51.67-1.79 (1.88-1.79)* |
| *R*sym or *R*merge (%) | 8.9 (55.6) |
| Mn(I) half-set correlation CC(1/2) (%) | 99.7 (69.3) |
| Total number of observations | 200263 (21663) |
| Total number unique | 42599 (5880) |
| *I / σI* | 13.9 (2.6) |
| Completeness (%) | 98.3 (93.4) |
| Redundancy | 4.7 (3.7) |
| Wilson *B*-factor (Å2) | 15.31 |
| **Refinement** |  |
| No. reflections | 42435 (3904) |
| *R*work / *R*free (%) | 19.3 (23.4) |
| No. atoms |  |
| Chain A | 2244 |
| Chain B | 828 |
| Chain C | 56 |
| Solvent | 326 |
| *B*-factors (Å2) |  |
| Chain A | 19.41 |
| Chain B | 24.96 |
| Chain C | 20.23 |
| Solvent | 30.25 |
| R.m.s. deviations |  |
| Bond lengths (Å) | 0.009 |
| Bond angles (°) | 1.35 |
| Ramachandran plot |  |
| *Most favored* (%) | 99.2 |
| *Additional allowed* (%) | 0.80 |

*Values in parentheses are for highest-resolution shell.
